# Supplementary material for: Replication of genome-wide association studies (GWAS) loci for fasting plasma glucose in African-Americans
Source: PubMed Central journal article supplement — Diabetologia. 2010 Dec 25;54(4):783–8. doi: 10.1007/s00125-010-2002-7 (PMC3052446; doi:10.1007/s00125-010-2002-7), 2010-12-25

# GCPC2

## rs560887

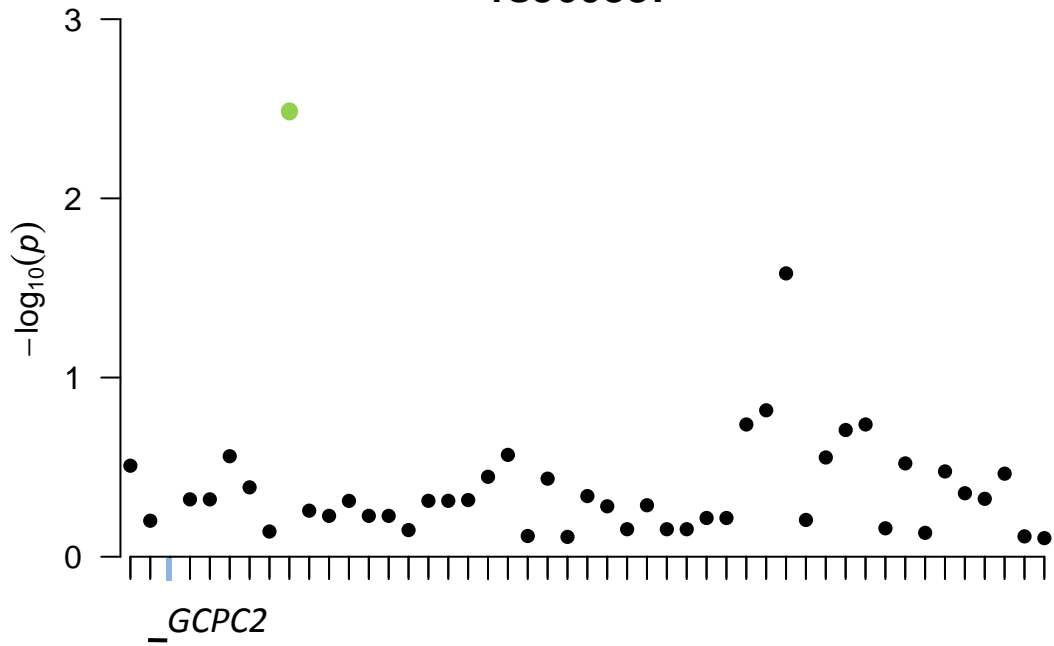

rs13431652  
rs12475700  
rs560887  
rs563694  
rs537183  
rs475612  
rs478333  
rs496550  
rs575671  
rs519887  
rs486981  
rs484066  
rs569805  
rs579060  
rs508506  
rs503931  
rs551754  
rs497692  
rs494874  
rs552976  
rs472614  
rs565412  
rs567074  
rs479682  
rs480562  
rs2544367  
rs2685805  
rs1581397  
rs2685812  
rs2685813  
rs2685814  
rs860510  
rs853788  
rs853787  
rs853786  
rs862662  
rs853785  
rs853784  
rs853783  
rs853781  
rs853780  
rs1101533  
rs853779  
rs853778  
rs853776  
rs853773  
rs853772

Physical Distance: 61.2 kb  
LD Map Type:  $r^2$

0 0.2 0.4 0.6 0.8 1

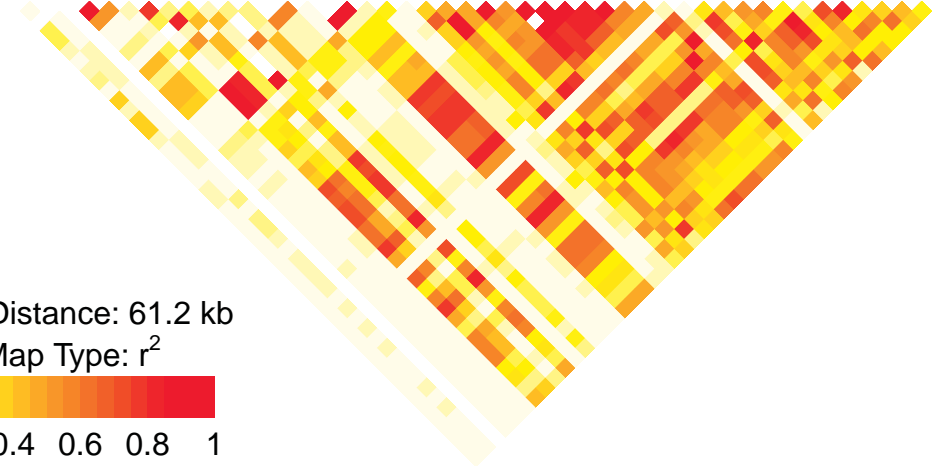

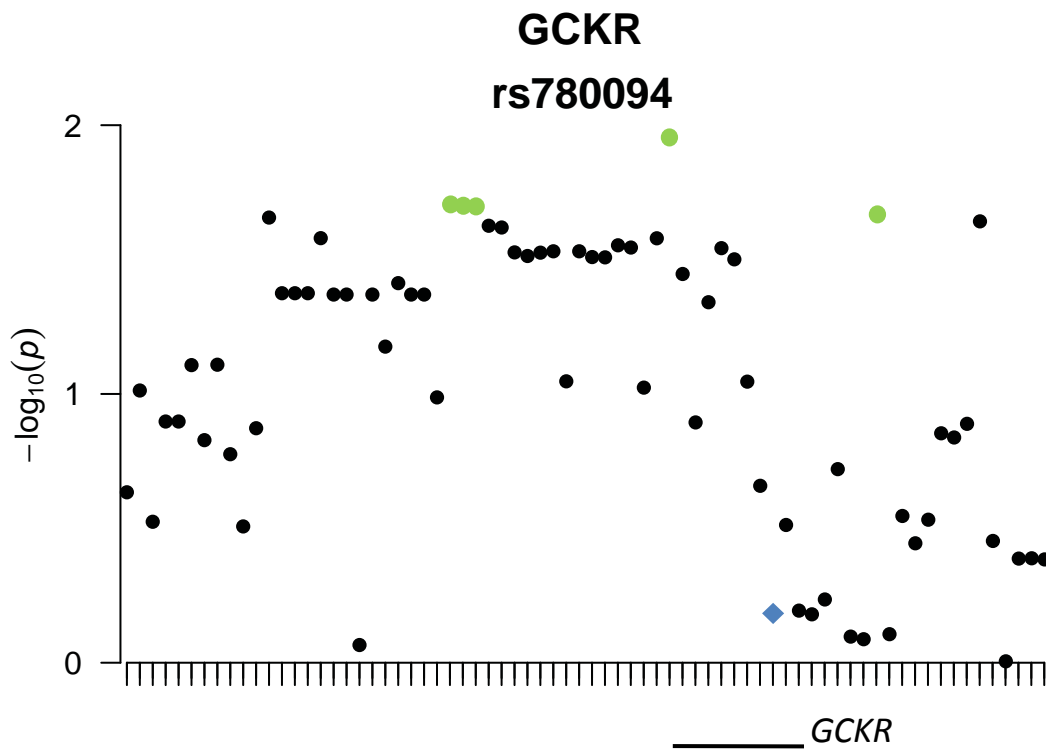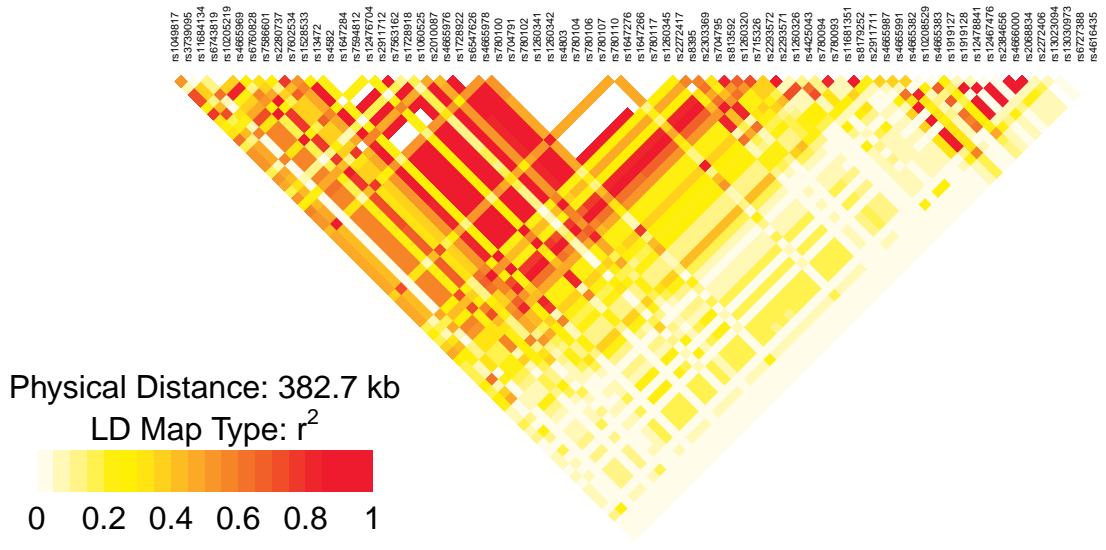

# DGKB-TMEM195

## rs2191349

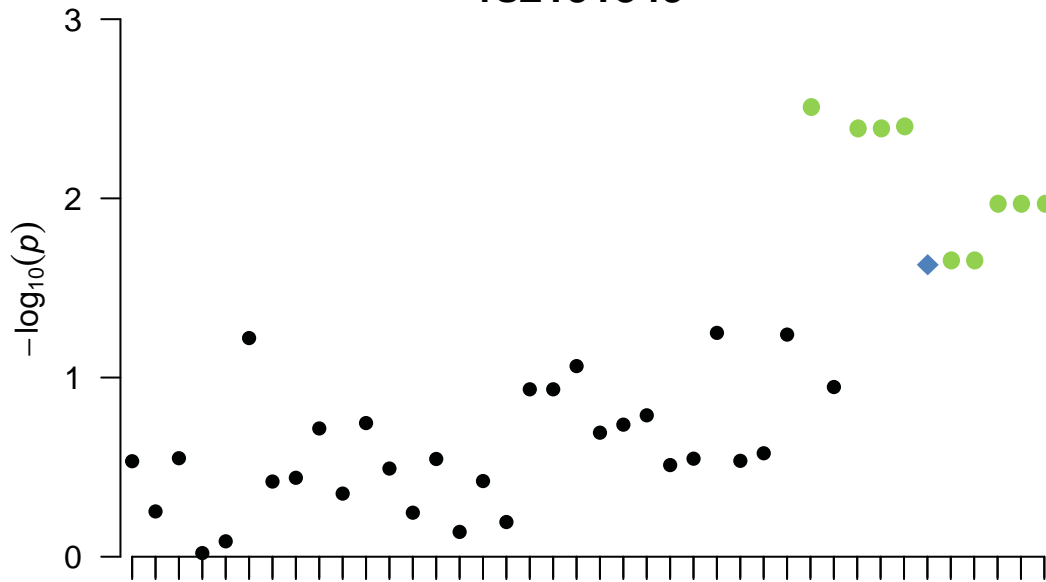

rs7800343  
rs12670968  
rs6461145  
rs17168579  
rs1002061  
rs2884397  
rs4721397  
rs9639217  
rs6978769  
rs4719430  
rs7784091  
rs6976086  
rs6976381  
rs12699673  
rs6962498  
rs12113083  
rs6960043  
rs10267273  
rs10238161  
rs2191346  
rs2358158  
rs10807778  
rs10238625  
rs10264723  
rs2215381  
rs7798124  
rs7781710  
rs10950549  
rs4721400  
rs10487796  
rs2215383  
rs10244051  
rs10258074  
rs2191348  
rs2191349  
rs6947830  
rs4719433  
rs1974620  
rs1558317  
rs1558318

Physical Distance: 44.4 kb

LD Map Type:  $r^2$

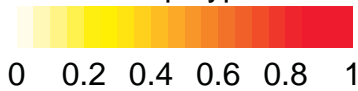

# SLC30A8

## rs11558471

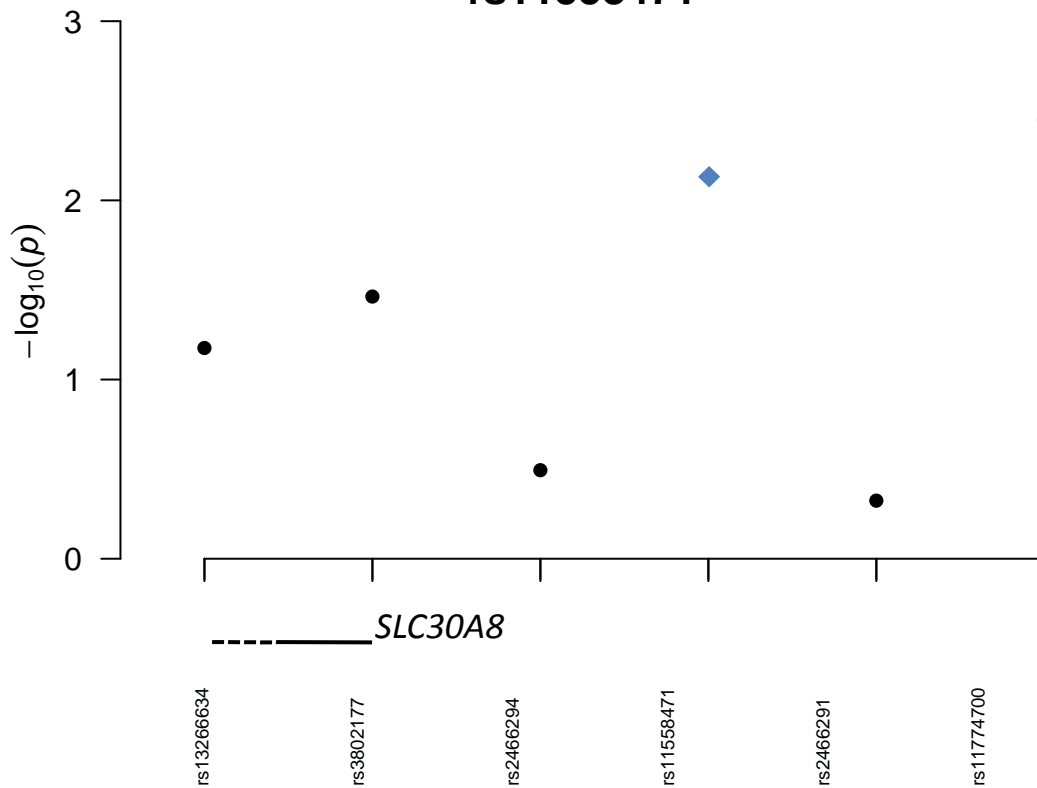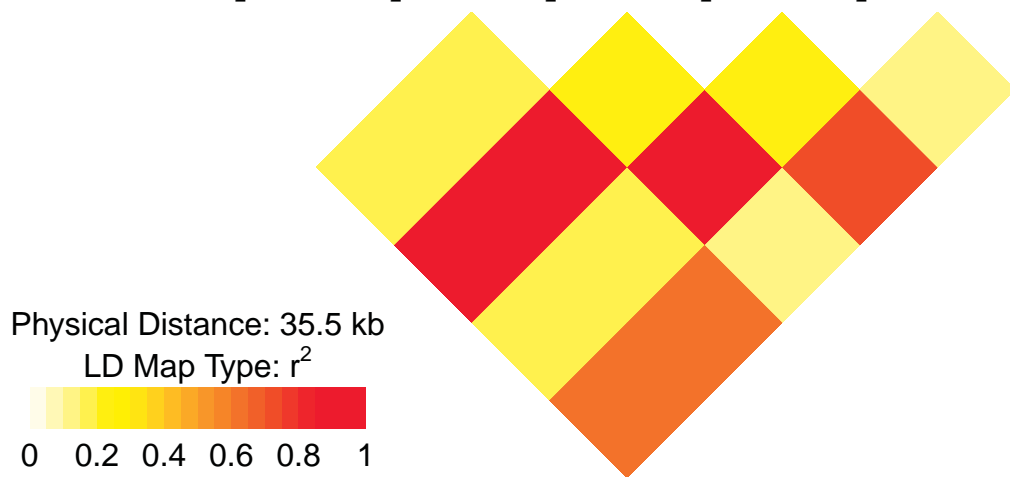

# TCF7L2

## rs4506565

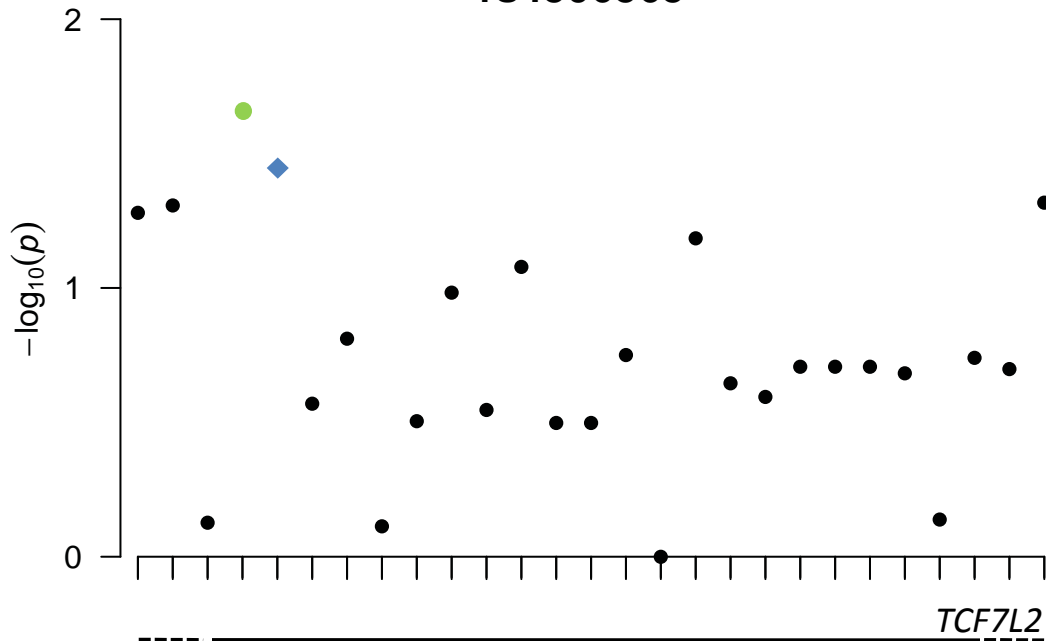

rs4074720  
rs4074718  
rs17747324  
rs7901695  
rs4506565  
rs10885402  
rs6585198  
rs4132670  
rs6585200  
rs6585201  
rs7904519  
rs10885405  
rs10885406  
rs10787472  
rs7924080  
rs12243326  
rs7077039  
rs7900150  
rs7100927  
rs7895340  
rs11196200  
rs11196205  
rs10885409  
rs12255372  
rs12265291  
rs11196208  
rs7077247

Physical Distance: 63.6 kb  
LD Map Type:  $r^2$

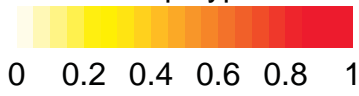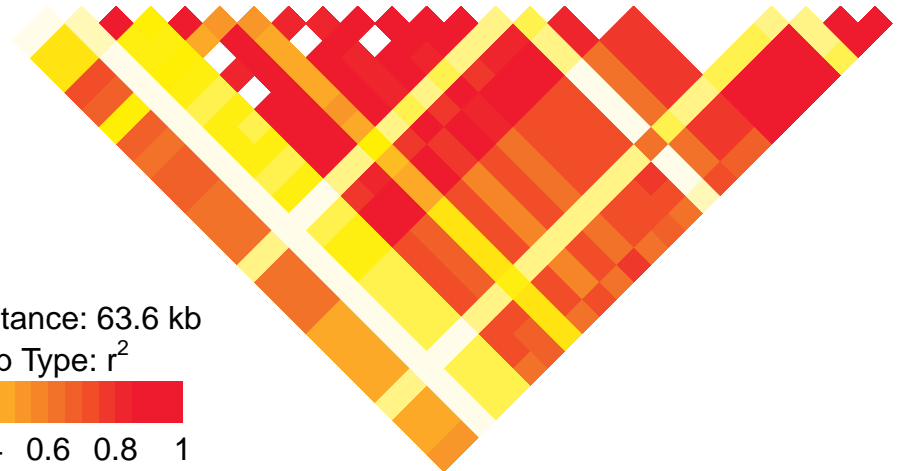

# MTNR1B

## rs10830963

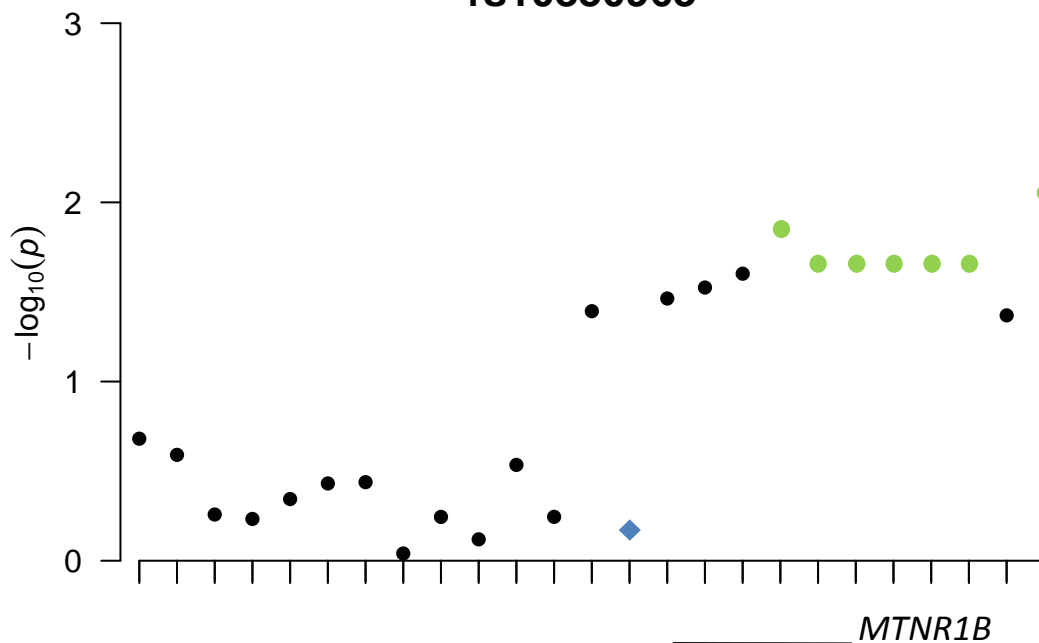

rs11020107  
rs3847554  
rs12792753  
rs1387153  
rs11523890  
rs10830956  
rs7933855  
rs2166706  
rs10830961  
rs10830962  
rs4753426  
rs7951037  
rs10765576  
rs10830963  
rs3781638  
rs1562444  
rs4753073  
rs1447350  
rs1447351  
rs4611171  
rs1597023  
rs4406791  
rs1447352  
rs6483213  
rs9666752

Physical Distance: 58.7 kb

LD Map Type:  $r^2$

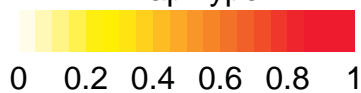



# ZMAT4

## rs2722425

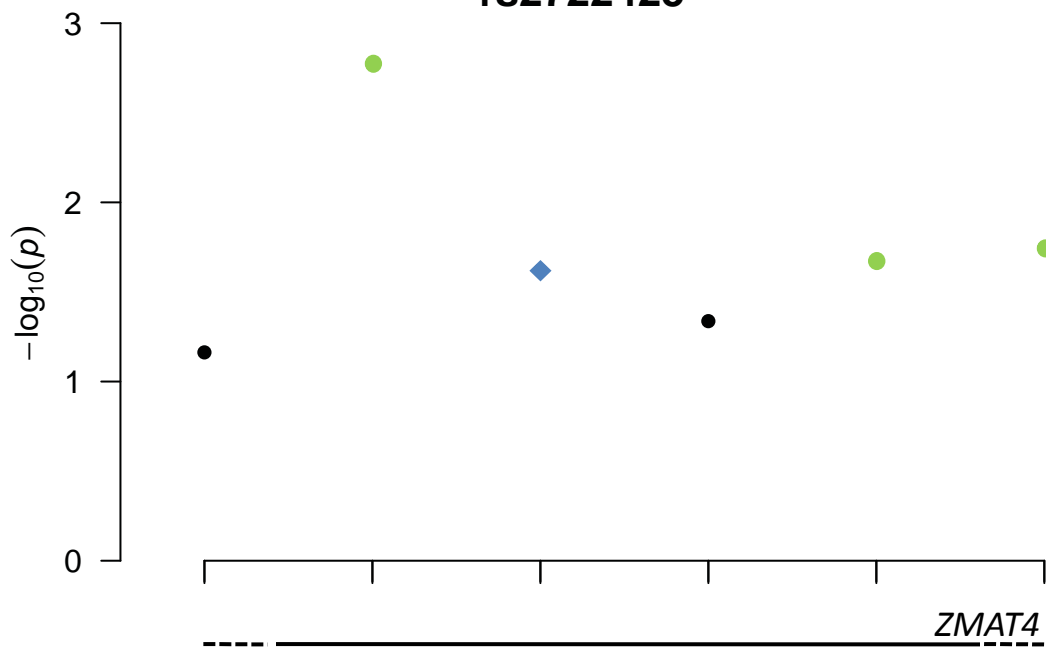

rs1197383      rs2722429      rs2722425      rs7833815      rs12114099      rs1823643

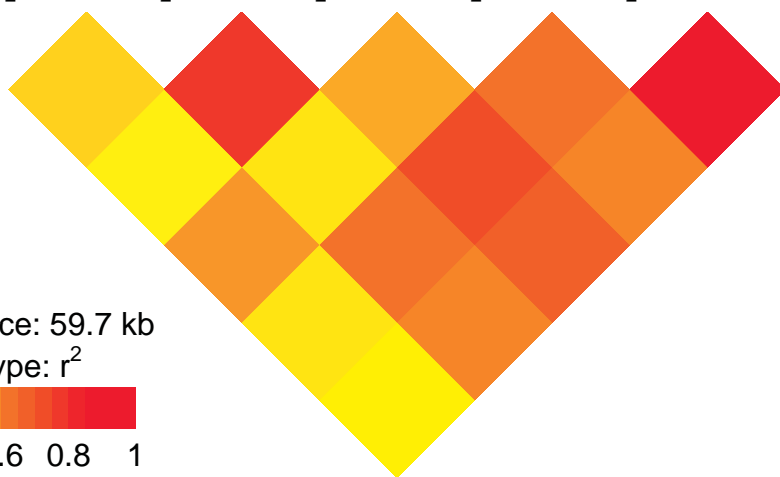

Physical Distance: 59.7 kb

LD Map Type:  $r^2$

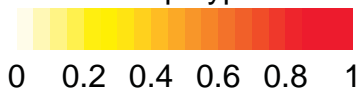

Supplement: 125_2010_2002_MOESM4_ESM.pdf [file 125_2010_2002_MOESM4_ESM.pdf]
