# Supplementary material for: Replication of genome-wide association studies (GWAS) loci for fasting plasma glucose in African-Americans
Source: PubMed Central journal article supplement — Diabetologia. 2010 Dec 25;54(4):783–8. doi: 10.1007/s00125-010-2002-7 (PMC3052446; doi:10.1007/s00125-010-2002-7), 2010-12-25
Supplement: 125_2010_2002_MOESM1_ESM.pdf [file 125_2010_2002_MOESM1_ESM.pdf]

## Electronic supplementary material

**ESM Table 1** Characteristics of HUFS participants

| <b>Characteristic</b>                | <b>Men</b> | <b>Women</b> |
|--------------------------------------|------------|--------------|
| <i>n</i> (%)                         | 389 (42)   | 538 (58)     |
| Age (years)                          | 46.1±12.6  | 46.9±13.5    |
| Body mass index (kg/m <sup>2</sup> ) | 28.3±6.9   | 31.4±8.7     |
| Fasting plasma glucose (mmol/l)      | 4.8±0.7    | 4.7±0.6      |
| Insulin (mmol/l)                     | 9.4±9.8    | 11.1±9.9     |
| High density lipoprotein (mmol/l)    | 1.3±0.5    | 1.4±0.4      |
| Low density lipoprotein (mmol/l)     | 2.9±1.0    | 3.1±1.0      |
| Systolic blood pressure (mmHg)       | 130.3±20.2 | 129.1±20.7   |
| Diastolic blood pressure (mmHg)      | 82.1±13.5  | 80.5±12.3    |

Data expressed as number (percentage) or mean±standard deviation
