# Supplementary material for: Replication of genome-wide association studies (GWAS) loci for fasting plasma glucose in African-Americans
Source: PubMed Central journal article supplement — Diabetologia. 2010 Dec 25;54(4):783–8. doi: 10.1007/s00125-010-2002-7 (PMC3052446; doi:10.1007/s00125-010-2002-7), 2010-12-25
Supplement: 125_2010_2002_MOESM3_ESM.pdf [file 125_2010_2002_MOESM3_ESM.pdf]

## Electronic supplementary material

**ESM Table 3** Distribution of estimated power for HUFS to replicate reported SNPs in the MAGIC study

| SNP        | Nearest gene   | Reported effect (mmol/l) | Dataset  | HUFS MAF | Power |
|------------|----------------|--------------------------|----------|----------|-------|
| rs340874   | <i>PROX1</i>   | 0.013                    | HUFS     | 0.101    | 0.25  |
| rs780094   | <i>GCKR</i>    | 0.029                    | HUFS     | 0.161    | 0.94  |
| rs11708067 | <i>ADCY5</i>   | 0.027                    | HUFS     | 0.147    | 0.88  |
| rs11920090 | <i>SLC2A2</i>  | 0.02                     | HUFS     | 0.356    | 0.88  |
|            | <i>DGKB-</i>   |                          |          |          |       |
| rs2191349  | <i>TMEM195</i> | 0.03                     | HUFS     | 0.380    | 0.99  |
| rs11558471 | <i>SLC30A8</i> | 0.027                    | HUFS     | 0.081    | 0.69  |
| rs7034200  | <i>GLIS3</i>   | 0.018                    | HUFS     | 0.357    | 0.81  |
| rs10885122 | <i>ADRA2A</i>  | 0.022                    | HUFS     | 0.295    | 0.91  |
| rs4506565  | <i>TCF7L2</i>  | 0.023                    | HUFS     | 0.454    | 0.96  |
| rs10830963 | <i>MTNR1B</i>  | 0.067                    | HUFS     | 0.065    | 0.99  |
| rs11605924 | <i>CRY2</i>    | 0.015                    | HUFS     | 0.128    | 0.37  |
| rs7944584  | <i>MADD</i>    | 0.021                    | HUFS     | 0.050    | 0.32  |
| rs560887   | <i>G6PC2</i>   | 0.075                    | Perlegen | 0.043    | 0.99  |
| rs4607517  | <i>GCK</i>     | 0.062                    | HapMap   | 0.104    | 0.99  |
| rs174550   | <i>FADS1</i>   | 0.017                    | Perlegen | 0.065    | 0.28  |
| rs11071657 | <i>C2CD4B</i>  | 0.008                    | N/A      | N/A      | N/A   |

<sup>a</sup>As reported for fasting glucose for  $n=45,049-76,558$  in Dupuis et al. [1]

<sup>b</sup>The HUFS dataset used to estimate power is based on  $n=927$

<sup>c</sup>Not available in HUFS for direct replication

<sup>d</sup>African-American panels from Perlegen (AFD\_AFR) and HapMap (ASW) were used as alternative datasets to estimate power

## Reference

1. Dupuis J, Langenberg C, Prokopenko I et al. (2010) New genetic loci implicated in fasting glucose homeostasis and their impact on type 2 diabetes risk. *Nat Genet* 42:105–116
