# Supplementary figures and images for: Replication of genome-wide association studies (GWAS) loci for fasting plasma glucose in African-Americans
Source: PubMed Central journal article supplement — Diabetologia. 2010 Dec 25;54(4):783–8. doi: 10.1007/s00125-010-2002-7 (PMC3052446; doi:10.1007/s00125-010-2002-7), 2010-12-25

ESM Figure 2

CEU

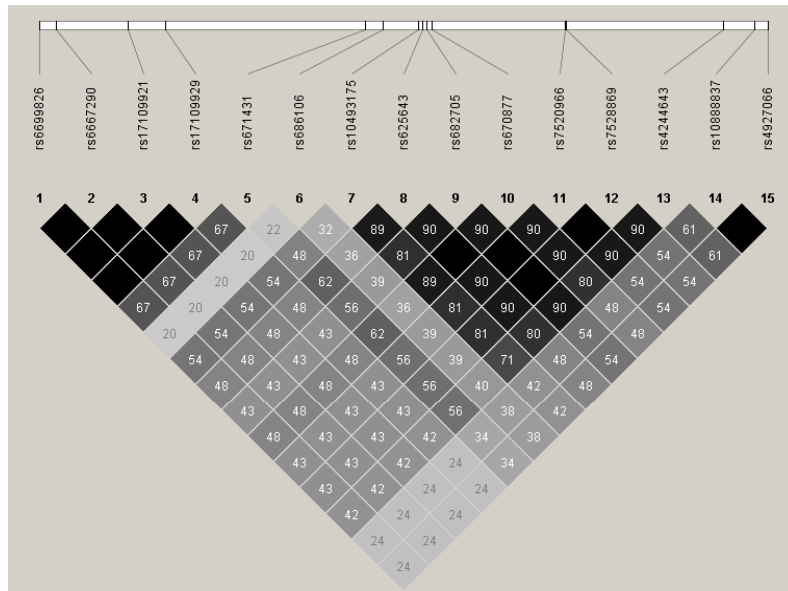

YRI

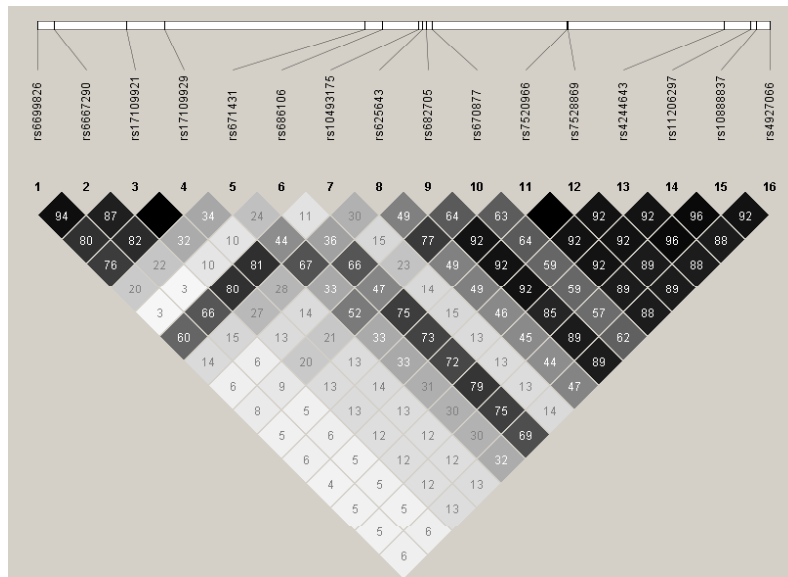

ASW

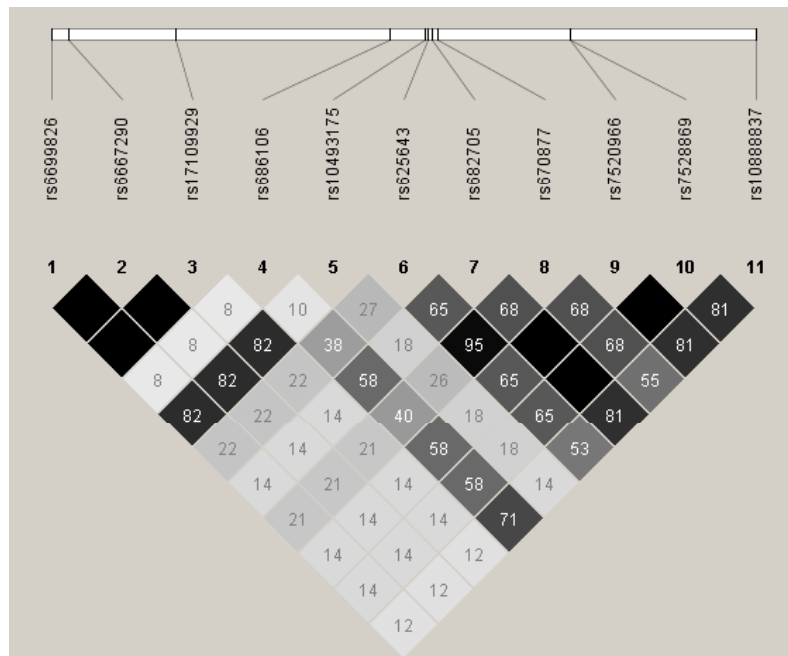

Supplement: 125_2010_2002_MOESM5_ESM.pdf [file 125_2010_2002_MOESM5_ESM.pdf]

**AK024684**

**rs625643**

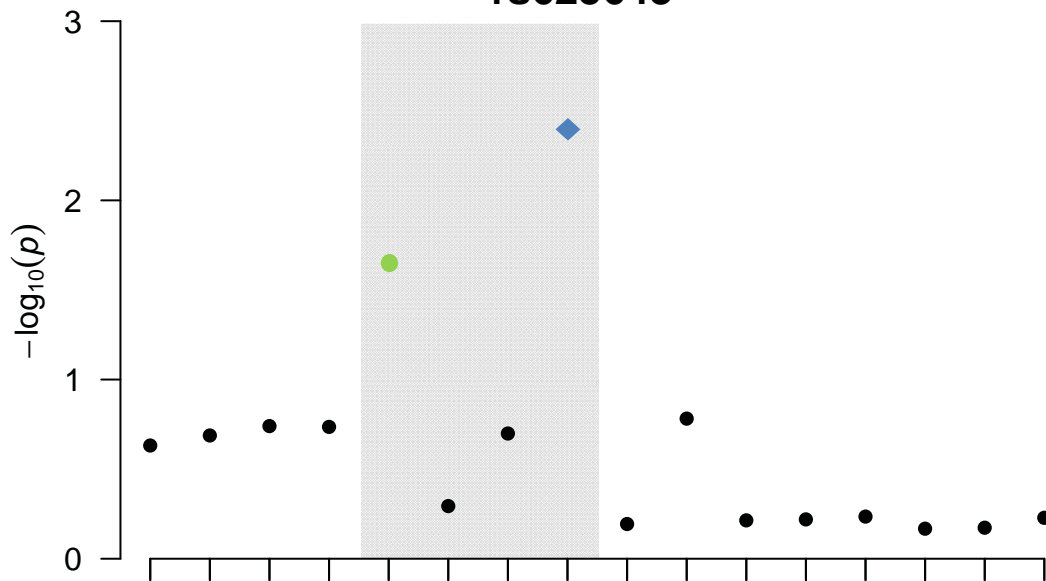

rs6699826  
rs6667290  
rs17109921  
rs17109929  
rs671431  
rs686106  
rs10493175  
rs625643  
rs682705  
rs670877  
rs7520966  
rs7528869  
rs4244643  
rs11206297  
rs10888837  
rs4927066

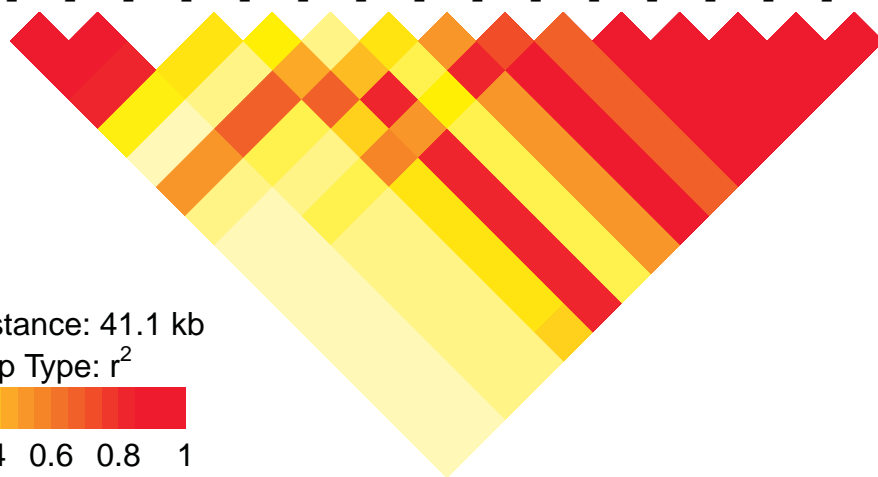

Physical Distance: 41.1 kb

LD Map Type:  $r^2$

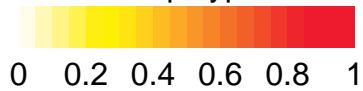

Supplement: 125_2010_2002_MOESM6_ESM.pdf [file 125_2010_2002_MOESM6_ESM.pdf]
